# Supplementary material for: Treatment of monogenic and digenic dominant genetic hearing loss by CRISPR-Cas9 ribonucleoprotein delivery in vivo
Source: Research Square preprint supplement (doi:10.21203/rs.3.rs-1836399/v1), 2022-07-15
Supplement: Supplementary file 1 [file f8a6ad66f23988c4c841239d.docx]

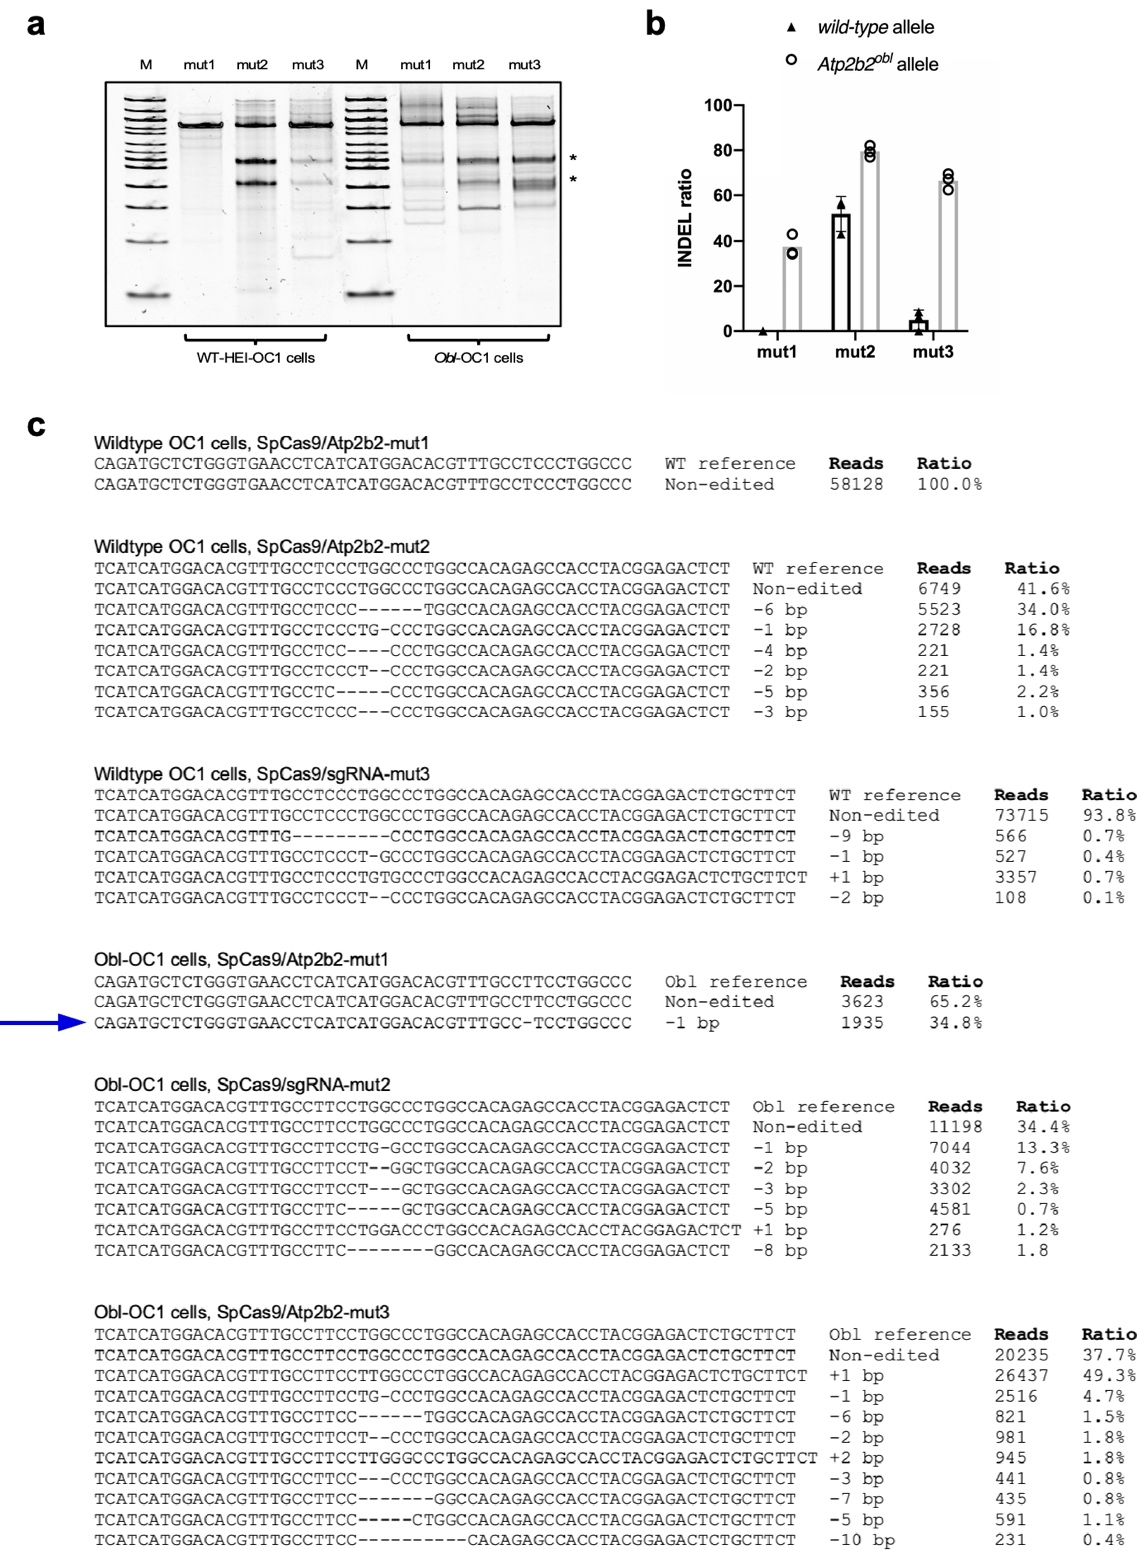
Supplementary Fig. 1.

**Allele-selective editing of WT or *Obl* mutant *Atp2b2* gene in OC1 cell line**. (**a**) T7E1 assay of the DNA from the HEI-OC1 and Obl-OC1 cells nucleofected with RNP complexes. The two resulting DNA fragments from cleavage were indicated by asterisks. (**b**) Distribution of the indels by NGS from the HEI-OC1 and Obl-OC1 cells nucleofected with RNP complexes. Columns and error bars represent the mean ± SD of three or more independent biological replicates. (**c**) NGS analysis identified indel reads in the WT HEI-OC1 and Obl-OC1 cells nucleofected with three RNP complexes. The arrow points to the major editing event of 1 bp deletion by *Atp2b2-*Mut1in the Obl-OC1 cells*.*

**Supplementary Fig. 2**

**
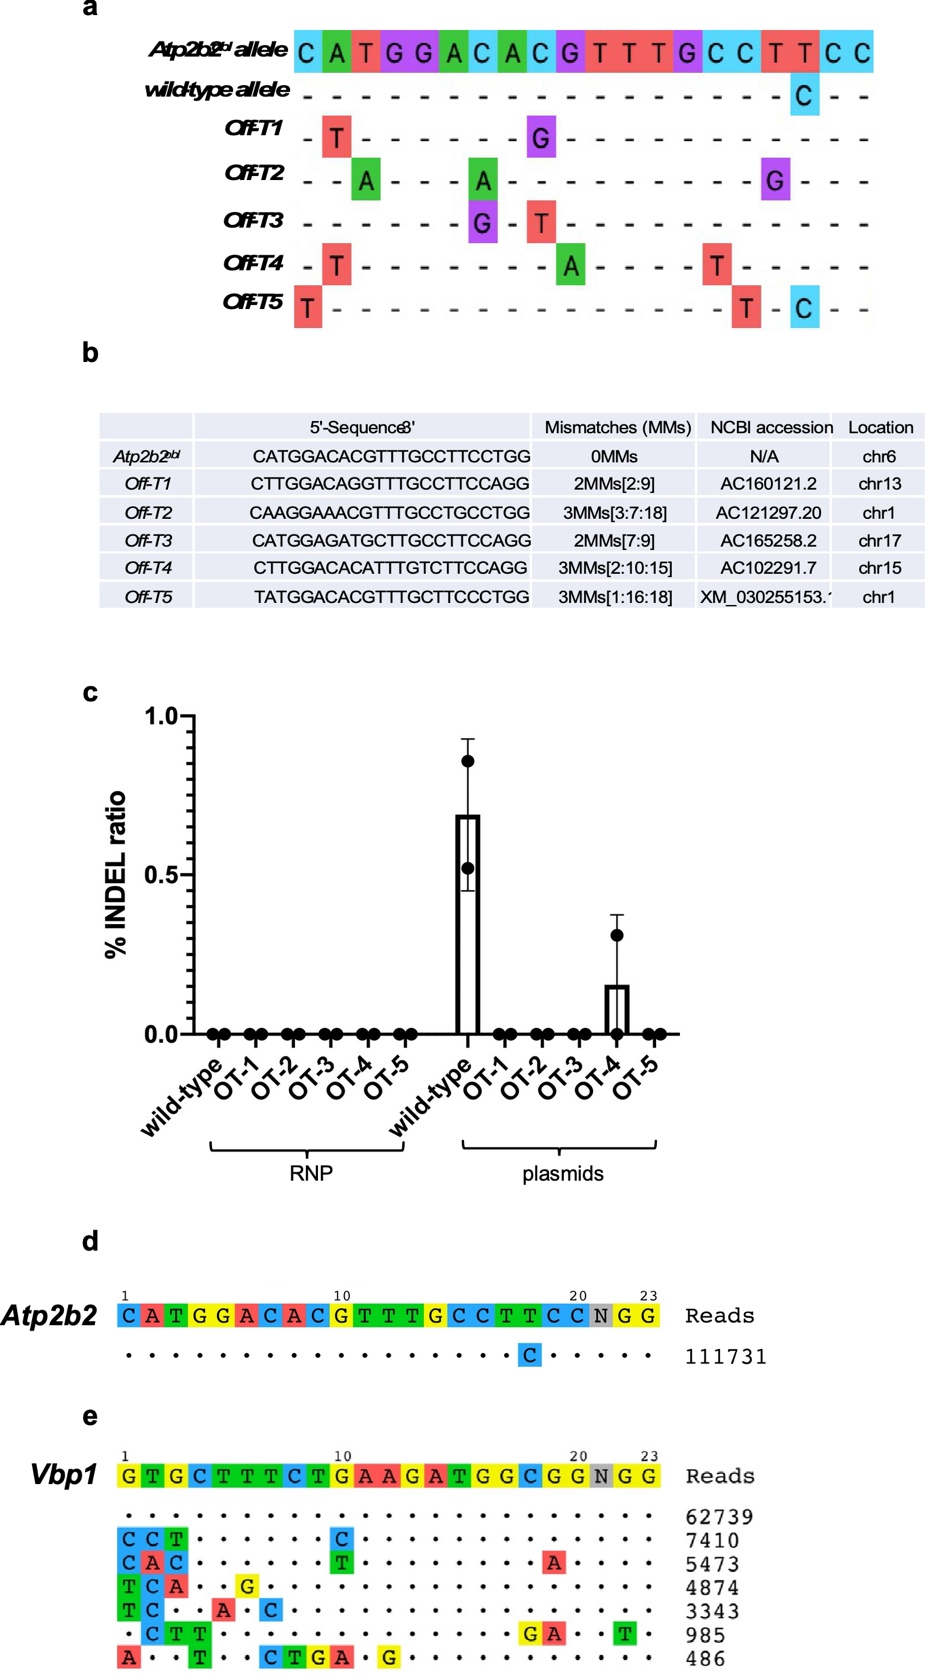
**

**Off-target analysis by computational prediction and GUIDE-seq.** (**a)** WT allele and five off-target sites identified by computational prediction using the CRISPR Design Tool (*28*). Mismatch positions are indicated counting the PAM as positions 21-23. (**b**) None of these loci were associated with hearing function. (**c**) Editing efficiency of predicted off-target loci analyzed by NGS in Obl-OC cells transfected with either RNP or plasmids DNA using a LONZA 4D-Nucleofector. The RNP delivery did not yield any off-target effect whereas the plasmid delivery showed the low-frequency editing at the WT and OT-4 loci. (**d**) Editing efficiency of predicted off-target loci analyzed by GUIDE-seq in Obl-OC cells transfected with Cas9;Atp2b2-mut1 RNP. Consistent with NGS analysis of computationally predicted sites, no off-target loci were observed by GUIDE-seq method. (**E**) QUIDE-seq study on control gene Vbp1 in Obl-OC1 cells by RNP delivery of Cas9:Vbp1-gRNA identified multiple off-targets with varying frequencies shown by NGS. Mismatches compared to the on-target site are shown and highlighted in color.

**Supplementary Fig. 3**

**
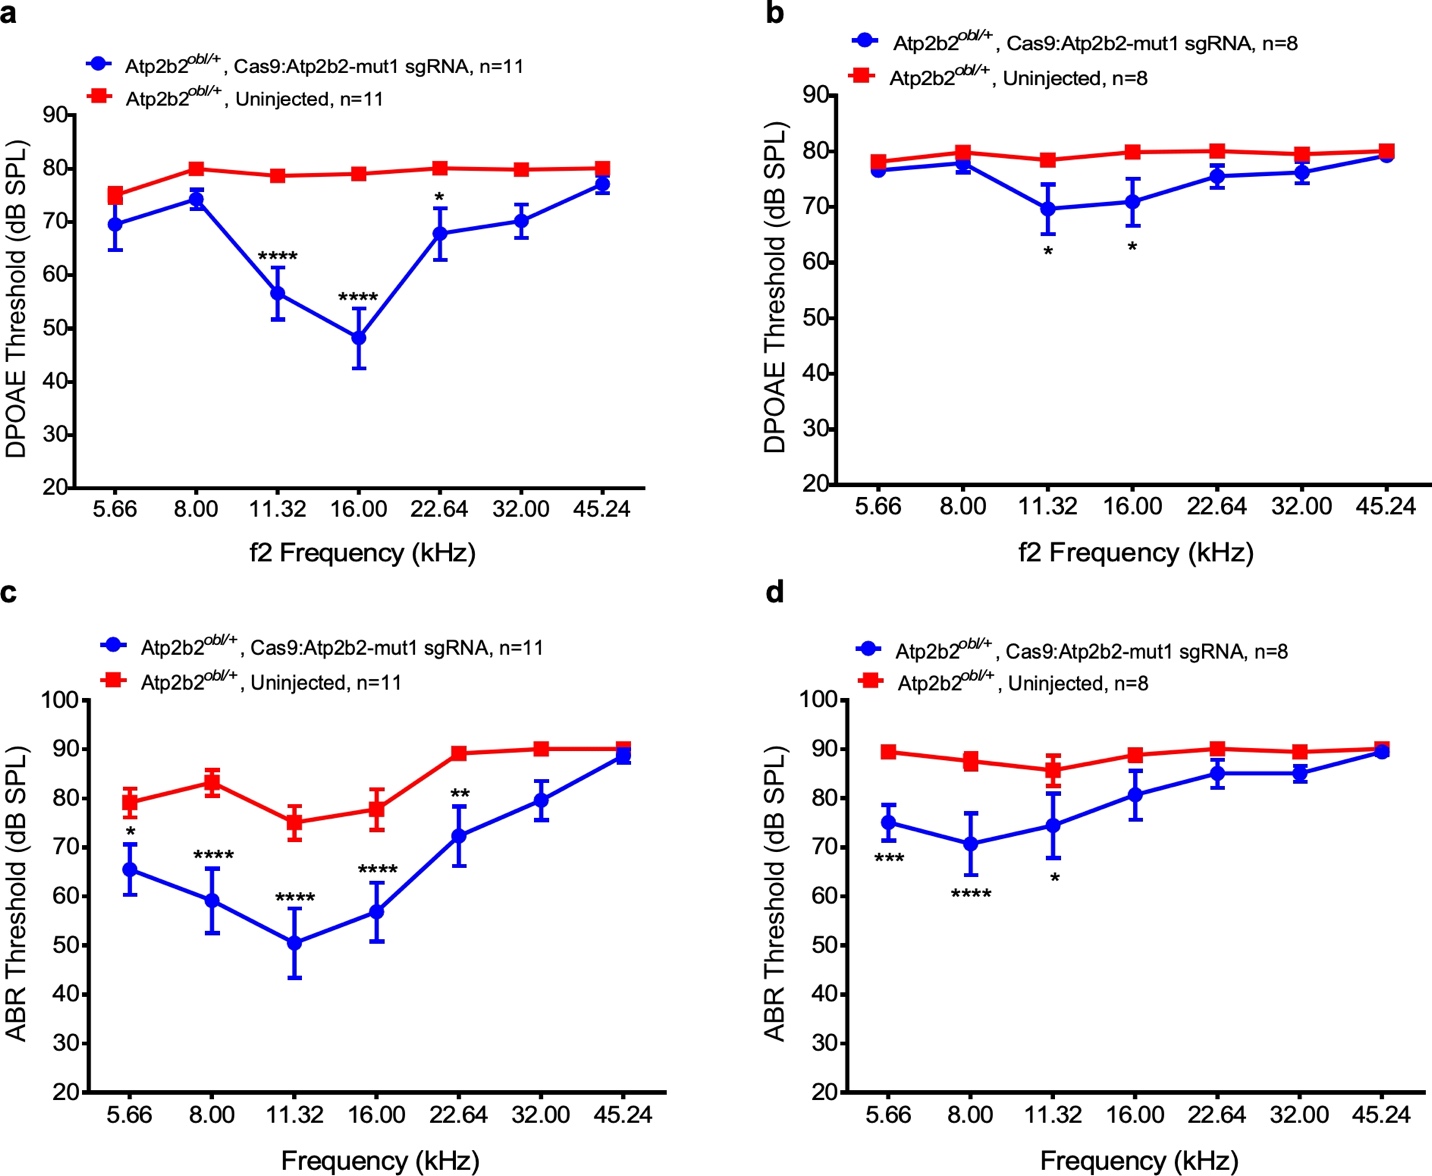
**

**Long term rescue of OHC function and hearing by *in vivo* lipid mediated delivery of Cas9:sgRNA.** Significantly reduced DPOAE thresholds in *Atp2b2Obl/+* ears injected with Cas9:Atp2b2-mut1:Lipo2000 (blue) and uninjected *Atp2b2Obl/+*ears (red) at (**a**) 8 weeks, (**b**) 16 weeks after the injection. Significantly reduced ABR thresholds in *Atp2b2Obl/+*ears injected with Cas9:Atp2b2-mut1 sgRNA:Lipo2000 (blue) and uninjected *Atp2b2Obl/+* ears (red) at (**c**) 8 weeks, (**d**) 16 weeks after the injection. Statistical tests were two-way ANOVA with Bonferroni correction for multiple comparisons: **p < 0.01, ***p < 0.001, and ****p < 0.0001. Values and error bars reflect mean ± SEM.

**
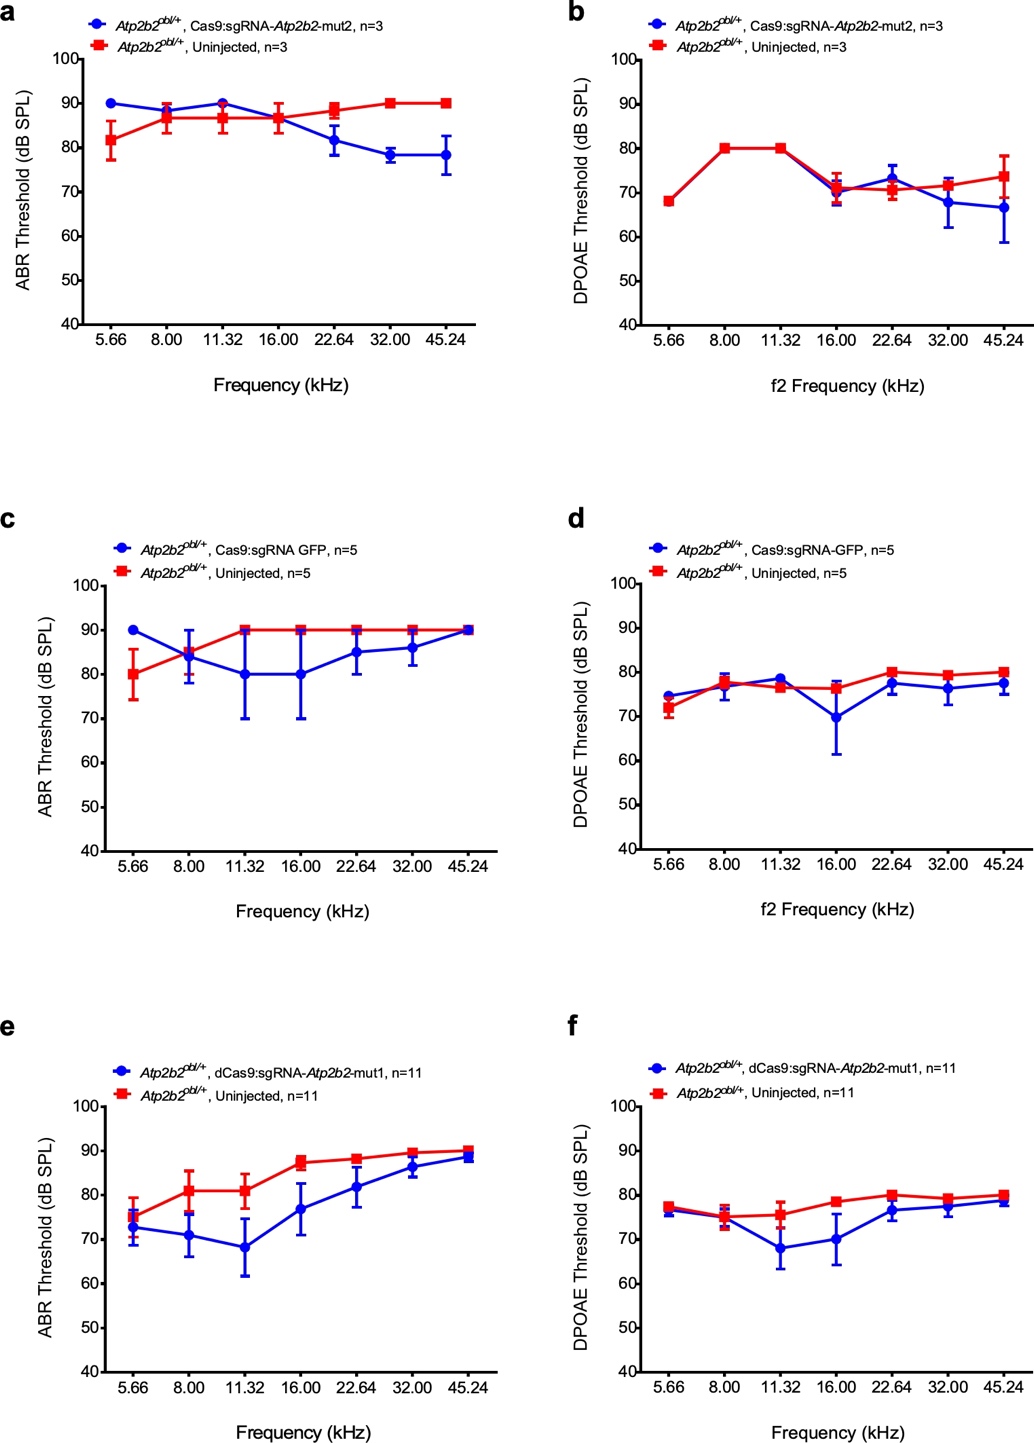
Supplementary Fig. 4**

**Hearing rescue is gRNA and Obl allele specific and depends on Cas9 DNA cleavage activity.** (**a**) ABR and (**b**) DPOAE thresholds in *Atp2b2Obl/+*ears injected with Cas9:Atp2b2-mut2 sgRNA:Lipo2000 (blue) and uninjected *Atp2b2Obl/+*ears (red) at four weeks. (**c**) ABR and (**d**) DPOAE thresholds in *Atp2b2Obl/+* ears injected with Cas9:GFP-sgRNA:Lipo2000 (blue) and uninjected *Atp2b2Obl/+* ears (red) at four weeks. (**e**) ABR and (**f**) DPOAE thresholds in *Atp2b2Obl/+* ears injected with dCas9:Atp2b2-mut1 sgRNA:Lipo2000 (blue) and uninjected *Atp2b2Obl/+*ears (red) at four weeks.

Supplementary Fig. 5

**
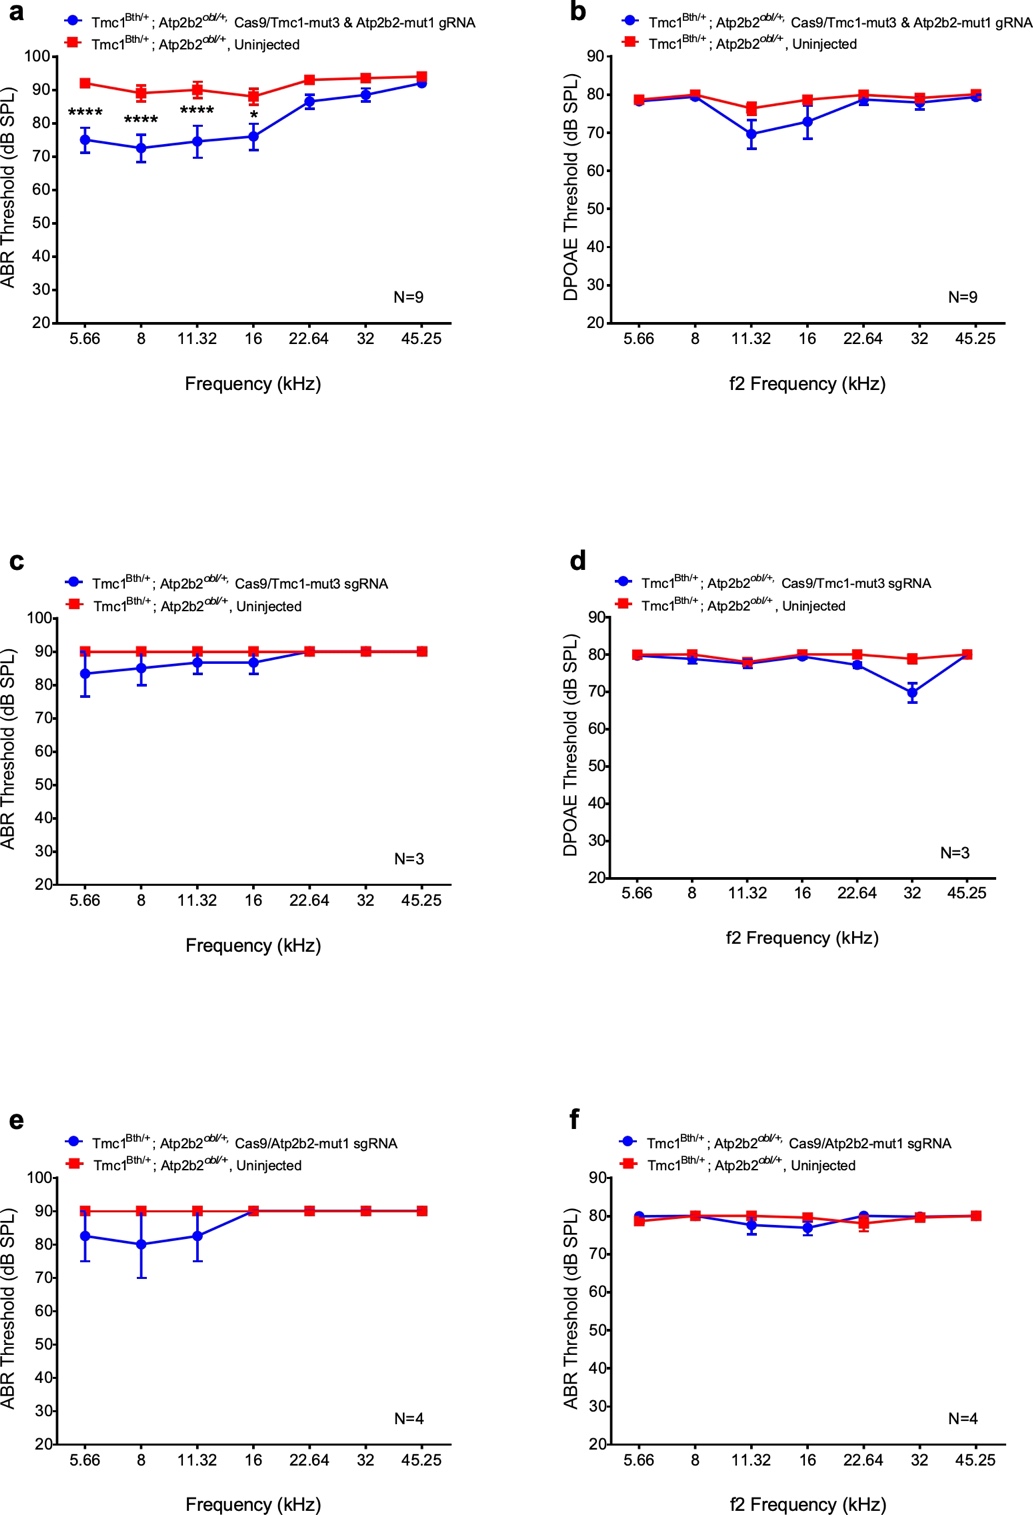
**

***In vivo* gene editing partially rescues hearing of digenic mutation origin.** (**a**) ABR and (**b**) DPOAE thresholds in *Atp2b2Obl/:Tmc1Bth/+* ears injected with Cas9:*Atp2b2*-mut1:*Tmc1*-mut3:Lipo2000 (blue) and uninjected *Atp2b2Obl/:Tmc1Bth/+* ears (red) at four weeks post injection. (**c**) ABR and (**d**) DPOAE thresholds in *Atp2b2Obl/:Tmc1Bth/+* ars injected with Cas9:Tmc1-mut3:Lipo2000 (blue) and uninjected *Atp2b2Obl/:Tmc1Bth/+* ears (red) at four weeks. (**e**) ABR and (**F**) DPOAE thresholds in *Atp2b2Obl/:Tmc1Bth/+*ears injected with Cas9:Atp2b2-mut1 sgRNA:Lipo2000 (blue) and uninjected *Atp2b2Obl/:Tmc1Bth/+*ears (red) at four weeks post injection. **p < 0.01, ***p < 0.001, and ****p < 0.0001. Values and error bars reflect mean ± SEM.
